# Supplementary material
Source: publisher figshare collection journal article supplement (https://acs.figshare.com/ndownloader/files/7962568)
Supplement: Supplementary file 1 [file 7962568]

## SUPPORTING INFORMATION

for

**Physical Molecular Mechanics Method for Damped Dispersion**Pragya Verma, Bo Wang,<sup>‡</sup> Laura E. Fernandez,<sup>†</sup> and Donald G. Truhlar\**Department of Chemistry, Nanoporous Materials Genome Center, Chemical Theory Center, and Minnesota Supercomputing Institute, University of Minnesota, Minneapolis, MN 55455-0431*

\*E-mail: truhlar@umn.edu

Present Addresses:

<sup>‡</sup>BW: Global Energy Interconnection Research Institute, State Grid Corporation of China, San Jose, CA<sup>†</sup>LEF: American Chemical Society, Washington, D.C. 20036

Date and time of finalization of Supporting Information: Mar. 6, 2017, 11:57 pm.

Table S1 shows how damped dispersion contributions to the binding of two monomers are affected by the geometry of the monomer. The first column (**1**) with each DFT-D3 method refers to the case in which the geometries of the monomers are separately optimized and the second column (**2**) with each DFT-D3 method (and also SAPT(DFT)) refers to the case in which the geometries of the monomers are the same as in the complex.

**Table S1.** Damped dispersion contributions ( $\Delta E_{\text{dampdisp}}$  in kcal/mol)<sup>a</sup> for the NCCE31/05 database.

| Complex                                                          | SAPT(DFT)<br>Disp + Exch-Disp <sup>b</sup> | DD3S  |       | OLYP<br>-D3(BJ) |       | OPBE<br>-D3(BJ) |       |
|------------------------------------------------------------------|--------------------------------------------|-------|-------|-----------------|-------|-----------------|-------|
|                                                                  | 2                                          | 1     | 2     | 1               | 2     | 1               | 2     |
| (NH <sub>3</sub> ) <sub>2</sub>                                  | -2.11                                      | -2.05 | -2.05 | -1.73           | -1.73 | -1.77           | -1.77 |
| (HF) <sub>2</sub>                                                | -1.66                                      | -1.77 | -1.77 | -1.17           | -1.17 | -1.12           | -1.12 |
| (H <sub>2</sub> O) <sub>2</sub>                                  | -2.30                                      | -2.30 | -2.30 | -1.69           | -1.69 | -1.66           | -1.66 |
| NH <sub>3</sub> ...H <sub>2</sub> O                              | -3.03                                      | -2.84 | -2.85 | -2.13           | -2.13 | -2.11           | -2.11 |
| (HCONH <sub>2</sub> ) <sub>2</sub>                               | -7.41                                      | -7.29 | -7.26 | -5.71           | -5.71 | -5.78           | -5.78 |
| (HCOOH) <sub>2</sub>                                             | -8.78                                      | -7.90 | -8.02 | -5.94           | -6.00 | -5.93           | -5.97 |
| C <sub>2</sub> H <sub>4</sub> ...F <sub>2</sub>                  | -1.63                                      | -1.19 | -1.19 | -1.16           | -1.16 | -1.24           | -1.24 |
| NH <sub>3</sub> ...F <sub>2</sub>                                | -1.80                                      | -0.98 | -0.98 | -0.88           | -0.88 | -0.90           | -0.90 |
| C <sub>2</sub> H <sub>2</sub> ...ClF                             | -5.01                                      | -5.27 | -5.29 | -4.28           | -4.28 | -4.23           | -4.23 |
| HCN...ClF                                                        | -4.18                                      | -3.52 | -3.53 | -2.67           | -2.68 | -2.61           | -2.61 |
| NH <sub>3</sub> ...Cl <sub>2</sub>                               | -4.70                                      | -3.51 | -3.55 | -2.93           | -2.94 | -2.95           | -2.96 |
| H <sub>2</sub> O...ClF                                           | -4.05                                      | -3.27 | -3.28 | -2.54           | -2.54 | -2.49           | -2.49 |
| NH <sub>3</sub> ...ClF                                           | -9.16                                      | -5.82 | -5.88 | -4.20           | -4.21 | -4.02           | -4.03 |
| (H <sub>2</sub> S) <sub>2</sub>                                  | -2.05                                      | -2.28 | -2.28 | -2.16           | -2.16 | -2.30           | -2.30 |
| (HCl) <sub>2</sub>                                               | -2.05                                      | -2.59 | -2.59 | -2.22           | -2.22 | -2.28           | -2.28 |
| HCl...H <sub>2</sub> S                                           | -2.96                                      | -3.40 | -3.40 | -2.86           | -2.86 | -2.92           | -2.92 |
| CH <sub>3</sub> Cl...HCl                                         | -3.63                                      | -4.58 | -4.60 | -3.93           | -3.93 | -4.02           | -4.03 |
| HCN...CH <sub>3</sub> SH                                         | -2.69                                      | -3.70 | -3.72 | -3.36           | -3.37 | -3.51           | -3.52 |
| CH <sub>3</sub> SH...HCl                                         | -4.61                                      | -5.49 | -5.49 | -4.66           | -4.65 | -4.76           | -4.76 |
| HeNe                                                             | -0.08                                      | -0.08 | -0.08 | -0.08           | -0.08 | -0.09           | -0.09 |
| HeAr                                                             | -0.13                                      | -0.13 | -0.13 | -0.13           | -0.13 | -0.15           | -0.15 |
| Ne <sub>2</sub>                                                  | -0.16                                      | -0.17 | -0.17 | -0.17           | -0.17 | -0.18           | -0.18 |
| NeAr                                                             | -0.27                                      | -0.28 | -0.28 | -0.29           | -0.29 | -0.32           | -0.32 |
| CH <sub>4</sub> ...Ne                                            | -0.33                                      | -0.36 | -0.36 | -0.38           | -0.38 | -0.41           | -0.41 |
| C <sub>6</sub> H <sub>6</sub> ...Ne                              | -1.00                                      | -1.03 | -1.03 | -1.09           | -1.09 | -1.20           | -1.21 |
| (CH <sub>4</sub> ) <sub>2</sub>                                  | -1.26                                      | -1.57 | -1.58 | -1.63           | -1.63 | -1.78           | -1.78 |
| (C <sub>2</sub> H <sub>2</sub> ) <sub>2</sub>                    | -1.42                                      | -1.82 | -1.83 | -1.84           | -1.85 | -2.00           | -2.00 |
| (C <sub>2</sub> H <sub>4</sub> ) <sub>2</sub>                    | -2.60                                      | -3.92 | -3.93 | -3.84           | -3.84 | -4.11           | -4.11 |
| sandwich (C <sub>6</sub> H <sub>6</sub> ) <sub>2</sub>           | -4.72                                      | -5.89 | -5.29 | -6.04           | -5.78 | -6.69           | -6.48 |
| T-shaped (C <sub>6</sub> H <sub>6</sub> ) <sub>2</sub>           | -4.07                                      | -6.02 | -5.42 | -5.73           | -5.47 | -6.14           | -5.94 |
| parallel-displaced (C <sub>6</sub> H <sub>6</sub> ) <sub>2</sub> | -5.82                                      | -7.31 | -6.71 | -7.50           | -7.25 | -8.30           | -8.09 |
| Average <sup>c</sup>                                             | -3.09                                      | -3.17 | -3.12 | -2.74           | -2.72 | -2.84           | -2.82 |
| Method MUE <sup>d</sup>                                          | 0.00                                       | 0.63  | 0.57  | 0.87            | 0.84  | 0.98            | 0.96  |

<sup>a</sup>  $\Delta E_{\text{dampdisp}}$  is defined as  $E_{\text{dampdisp}}^{\text{complex}} - E_{\text{dampdisp}}^{\text{monomer}_1} - E_{\text{dampdisp}}^{\text{monomer}_2}$ .

<sup>b</sup> Ref. 20 of the paper.

<sup>c</sup>The average for each method is taken over all 31 complexes.

<sup>d</sup>MUE = mean unsigned error.
